# Supplementary material for: Validation of Methods to Control for Immortal Time Bias in a Pharmacoepidemiologic Analysis of Renin–Angiotensin System Inhibitors in Type 2 Diabetes
Source: PubMed Central journal article supplement (PMC4074630; doi:10.2188/jea.je20130164), 2014-07-05
Supplement: je-24-267-s001.pdf [file je-24-267-s001.pdf]

## eTable

We obtained partial regression coefficients for age ( $\beta_a$ ) and duration of diabetes ( $\beta_b$ ) for demographic and metabolic covariables at enrollment, including HbA<sub>1c</sub>, BMI, SBP, LDL-C, HDL-C, triglyceride, ACR, and eGFR. We then re-estimated these values at the time when RAS inhibitors were started ( $X_t$ ), using the following formula:  $X_t = X_b + \beta_a T_i + \beta_b T_i$ , where  $X_b$  is the value at baseline and  $T_i$  is the immortal time (See appendix table for  $\beta_a$  and  $\beta_b$ ).

eTable. Estimated partial regression coefficients for age and duration of diabetes for metabolic indicators at baseline among RAS inhibitor users during follow-up

| <b>Variables</b>                                | <b>Partial regression coefficient of age</b> | <b>Partial regression coefficient of duration of diabetes</b> |
|-------------------------------------------------|----------------------------------------------|---------------------------------------------------------------|
| HbA <sub>1c</sub> , %                           | -0.00339                                     | 0.03902                                                       |
| BMI, kg/m <sup>2</sup>                          | -0.06353                                     | 0.03979                                                       |
| SBP, mm Hg                                      | 0.39584                                      | 0.03979                                                       |
| DBP, mm Hg                                      | -0.07609                                     | -0.09017                                                      |
| LDL-C, mmol/L                                   | 0.00379                                      | -0.00736                                                      |
| HDL-C, mmol/L                                   | 0.00281                                      | -0.00023                                                      |
| Triglyceride, mmol/L                            | -0.00204                                     | -0.01211                                                      |
| Ln (ACR+1), mg/mmol                             | -0.00464                                     | 0.00544                                                       |
| eGFR, ml min <sup>-1</sup> 1.73 m <sup>-2</sup> | -1.32369                                     | -0.22810                                                      |
